# Supplementary material for: Potential financial loss and risk factors for hamstring muscle injuries in elite male Brazilian soccer players: a season-long prospective cohort pilot study
Source: Front Sports Act Living. 2024 Sep 24;6:1360452. doi: 10.3389/fspor.2024.1360452 (PMC11458431; doi:10.3389/fspor.2024.1360452)
Supplement: Supplementary file 1 [file Table1.xlsx]

## Sheet: Brazilian Championship Serie A
Brazilian Championship Serie A	Merit Money (BRL)	Merit Money (USD)	Merit Money Defict (USD)
Champion	33000000	8.3629e+06
2nd. Place	31300000	7.93208e+06
3rd. Place	29700000	7.52661e+06
4th. Place	28000000	7.09579e+06
5th. Place	26400000	6.69032e+06
6th. Place	24700000	6.2595e+06
7th. Place	23100000	5.85403e+06
8th. Place	21400000	5.42321e+06
9th. Place	19800000	5.01774e+06
10th. Place	18500000	4.68829e+06
11th. Place	15500000	3.92803e+06
12.th. Place	14600000	3.69995e+06
13th. Place	13700000	3.47187e+06	Team position
14th. Place	12800000	3.24379e+06
15th. Place	11900000	3.01571e+06
16th. Place	11000000	2.78763e+06
17th. to 20th. Places	0	0
			-4.89103e+06

## Sheet: Brazil Cup
Brazil Cup	Merit Money (BRL)	Merit Money (USD)	Merit Money Defict (USD)
1st. Phase (Round of 80)	1150000	291434	OK
2nd. Phase (Round of 40)	1350000	342119	OK
3rd. Phase (Round of 32)	1700000	430816	OK
Round of 16	2700000	684237	OK
Quarterfinals	3450000	874303	OK (disqualified)
Semifinals	7300000	1.84997e+06
Final	56000000	1.41916e+07
TOTAL	73650000	1.86645e+07	-1.60416e+07

## Sheet: CONMEBOL Libertadores
CONMEBOL Libertadores	Merit Money (USD)	Merit Money Defict (USD)
Preliminary Phase 1	350000
Preliminary Phase 2	500000
Preliminary Phase 3	550000
Group Phase	3000000	OK (disqualified)
Round of 16	1050000
Quarterfinals	1200000
Semifinals	1750000
Final	12000000
TOTAL	20400000	-17400000

## Sheet: CONEMBOL Sudamericana
CONEMBOL Sudamericana	Merit Money (USD)	Merit Money Defict (USD)
Phase 1	300000
Phase 2	375000	OK
Round of 16	500000	OK
Quarterfinals	600000	OK
Semifinals	800000	OK (disqualified)
Final	4000000
TOTAL	6575000	-4300000

## Sheet: Merit Money Deficit
	Merit Money (USD)	Merit Money Deficit (USD)	Merit Money Deficit (BRL)	Merit Money Deficit (GBP)	Merit Money Deficit (EUR)	Merit Money (USD)
Brazilian Championship Serie A	8.3629e+06	-4.89103e+06	-1.93e+07	-3.83457e+06	-4.36769e+06
Brazil Cup	1.86645e+07	-1.60416e+07	-6.33e+07	-1.25766e+07	-1.43251e+07
CONMEBOL Libertadores	20400000	-17400000	-68660400	-13641600	-15538200
CONEMBOL Sudamericana	6575000	-4300000	-16967800	-3371200	-3839900
TOTAL	5.40024e+07	-4.26326e+07	-168228200	-3.3424e+07	-3.80709e+07	0.210542

## Sheet: Salary Paid
	BRL	USD
Total amount of salaries paid to players with image rights	148614962	3.76622e+07
Total of the soccer players	38	38
Salary paid/player/day	10863.7	2753.08
Total days off-field (i.e., recovery time)	202	202
Salaries paid to injured players	2.19446e+06	556123
% of total amount of salaries paid	0.0147661	0.0147661
% of Potential financial loss		0.0130445

## Sheet: Potential Financial Loss_Fig.1
Merit Money Total (USD)	Potential Financial Loss (USD)	Merit Money Total (%)	Earnings on merit money (%)		Potential Financial Loss (GBP)
5.40024e+07	4.31887e+07	1	0.210542		3.386e+07	45000000	1.114e+07	0.247557
